# Supplementary material for: The Photovoltaic Performance of Sensitizers for Organic Solar Cells Containing Fluorinated Chalcones with Different Halogen Substituents
Source: MDPI journal article supplement (doi:10.3390/cryst11111357), 2021-11-08
Supplement: s1 [file s1]

## Supplementary Information for:

### The photovoltaic performance of sensitizers for organic solar cells containing fluorinated chalcones with different halogen substituents

Siti Nabilla Aliya Mohd Nizar<sup>1</sup>, Siti Noor Farhana Ab Rahman<sup>1</sup>, Muhamad Fikri Zaini<sup>2</sup>,  
Ainizatul Husna Anizaim<sup>1</sup>, Ibrahim Abdul Razak<sup>1\*\*</sup> and Suhana Arshad<sup>1\*</sup>

<sup>1</sup>X-ray Crystallography Unit, School of Physics, Universiti Sains Malaysia, 11800 USM, Penang, Malaysia

<sup>2</sup>Pusat GENIUS@Pintar Negara, Universiti Kebangsaan Malaysia, 43600 Bangi, Selangor, Malaysia

\* correspondence: authors: suhanaarshad@usm.my \*, arazaki@usm.my \*\*

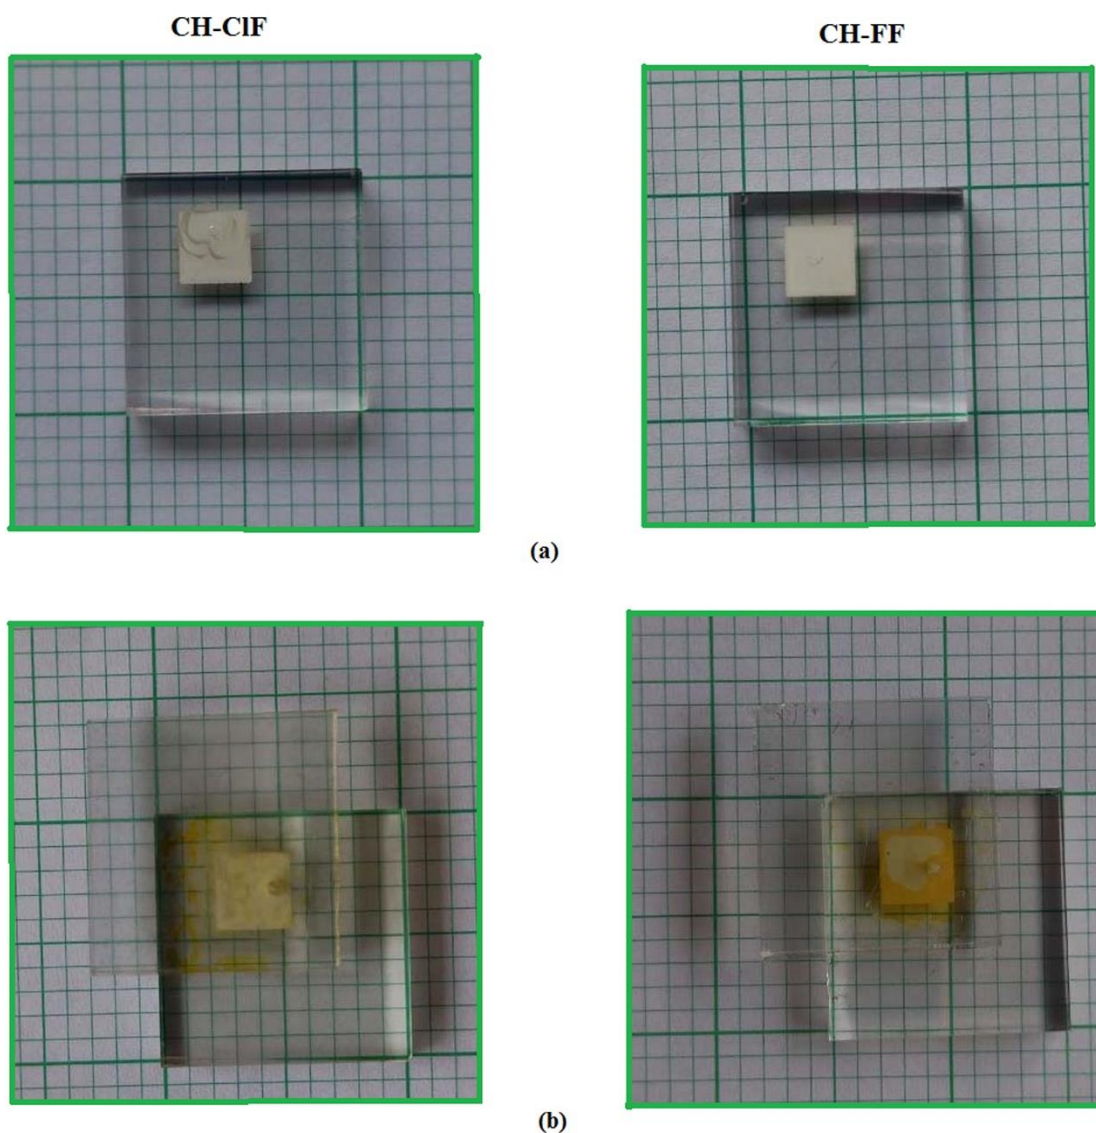

**Figure S1.** (a) The image of the sensitized TiO<sub>2</sub> on the working electrode before fabrication and (b) after fabrication with electrolyte injected on the **CH-CIF** and **CH-FF** cells.
